# Supplementary material for: The Temperature-Regulation of Pseudomonas aeruginosa cmaX-cfrX-cmpX Operon Reveals an Intriguing Molecular Network Involving the Sigma Factors AlgU and SigX
Source: PubMed Central journal article supplement (PMC7641640; doi:10.3389/fmicb.2020.579495), 2020-10-21
Supplement: Data_Sheet_1.pdf [file Data_Sheet_1.pdf]

# The temperature-regulation of *Pseudomonas aeruginosa* *cmaX-cfrX-cmpX* operon reveals an intriguing molecular network involving the sigma factors AlgU and SigX

Emeline Bouffartigues, Ishac Si Hadj Mohand, Olivier Maillot, Damien Tortuel, Jordane Omnes, Audrey David, Ali Tahrioui, Rachel Duchesne, Cecil Onyedikachi Azuama, Michael Nusser, Gerald Brenner-Weiss, Alexis Bazire, Nathalie Connil, Nicole Orange, Marc GJ Feuilloley, Olivier Lesouhaitier, Alain Dufour, Pierre Cornelis, Sylvie Chevalier

## SUPPLEMENTARY DATA

### Table of contents

|                                                                                                                                                                                     | Pages |
|-------------------------------------------------------------------------------------------------------------------------------------------------------------------------------------|-------|
| <b>Table S1:</b> Normalized expression of the studied genes under HS or CS in the indicated genetic background relative to <i>P. aeruginosa</i> H103 at 37°C                        | 2     |
| <b>Table S2:</b> Characteristics of proteins identified by Maldi-TOF analysis                                                                                                       | 3     |
| <b>Table S3:</b> Bacterial strains and plasmids used in this study                                                                                                                  | 4-5   |
| <b>Table S4:</b> Primer sequences of the indicated genes used for quantitative RT-qPCR reactions, transcription start sites identification and transcriptional fusions construction | 6-7   |
| <b>Fig. S1:</b> Flow cytometry analysis of <i>P. aeruginosa</i> H103 viability exposed or not to CS or HS                                                                           | 8     |
| <b>Fig. S2:</b> Effect of HS and CS on <i>algU</i> expression and activity                                                                                                          | 9     |
| <b>Fig. S3:</b> RpoH is not involved in the <i>cmaX</i> , <i>cfrX</i> and <i>cmpX</i> regulation in response to HS in mPAO1.                                                        | 10    |
| <b>Figure S4:</b> 2-DE total protein profiles of <i>P. aeruginosa</i> exposed to CS from 37°C to 4°C or not (control)                                                               | 11    |
| <b>Fig. S5:</b> c-di-GMP level quantification by LC/MS/MS in H103 strain exposed (square) or not to a CS (point)                                                                    | 12    |
| <b>Fig. S6:</b> Effect of a sublethal dose of valinomycin on membrane fluidity measured by fluorescence polarization in stationary growth phase                                     | 13    |

**Table S1: Normalized expression of the studied genes under HS or CS in the indicated genetic backgrounds relative to *P. aeruginosa* H103 at 37°C.**

| Target genes | Treatment | Genetic background |               |               |
|--------------|-----------|--------------------|---------------|---------------|
|              |           | H103               | $\Delta algU$ | $\Delta sigX$ |
| <i>cmaX</i>  | HS        | 5.9 ± 1            | 0.9 ± 0.2     |               |
|              | CS        | 1 ± 0.4            |               |               |
| <i>cfrX</i>  | HS        | 1.7 ± 0.3          | 1.3 ± 0.4     |               |
|              | CS        | 3.6 ± 0.08         |               | 1.3 ± 0.1     |
| <i>cmpX</i>  | HS        | 2.1 ± 0.4          | 1.3 ± 0.4     |               |
|              | CS        | 3.1 ± 0.3          |               | 1. ± 0.3      |
| <i>algU</i>  | HS        | 2.9 ± 1.7          |               |               |
|              | CS        | 1.4 ± 0.7          |               |               |
| <i>algD</i>  | HS        | 19.4 ± 6.3         | 6 ± 0.5       |               |
|              | CS        | 1.5 ± 0.3          |               |               |
| <i>rpoH</i>  | HS        | 4 ± 1.2            | 1.4 ± 0.3     |               |
|              | CS        | 1.3 ± 0.4          |               |               |
| <i>oprF</i>  | HS        | 1.6 ± 0.1          | 0.8 ± 0.2     |               |
|              | CS        | 1 ± 0.1            |               |               |
| <i>amrZ</i>  | HS        | 0.4 ± 0.1          | 0.3 ± 0.03    |               |
|              | CS        | 1 ± 0.3            |               |               |
| <i>sigX</i>  | HS        | 0.8 ± 0.1          | 0.6 ± 0.1     |               |
|              | CS        | 2 ± 0.6            |               | 0.9 ± 0.2     |
| <i>accA</i>  | HS        | 1 ± 0.1            |               |               |
|              | CS        | 1.8 ± 0.2          |               | 1.4 ± 0.1     |
| <i>accB</i>  | HS        |                    |               |               |
|              | CS        | 2.7 ± 0.3          |               | 1.9 ± 0.8     |
| PA5174       | HS        |                    |               |               |
|              | CS        | 2.5 ± 0.8          |               | 1.2 ± 0.5     |
| <i>psrA</i>  | HS        |                    |               |               |
|              | CS        | 0.5 ± 0.1          |               | 0.2 ± 0.02    |

**Table S2: Characteristics of proteins identified by Maldi-TOF analysis.**

| Spot number | RefSeq      | PA number | Protein name | Theoretical MW(kDa)/pI | method | Protein Score | Number of Matched peptides | Sequence coverage (%) |
|-------------|-------------|-----------|--------------|------------------------|--------|---------------|----------------------------|-----------------------|
| 1           | NP_251641.1 | PA2951    | EtfA         | 31.4/4.75              | MS/MS  | 54            | 1                          | 5                     |
| 2           | NP_259243.1 | PA0552    | Pgk          | 40.4/5.06              | MS/MS  | 123           | 2                          | 5                     |
| 3           | NP_251641.1 | PA2953    | EtfD         | 59.9/5.6               | MS/MS  | 42            | 1                          | 1                     |
| 4           | NP_253858.1 | PA5171    | ArcA         | 46.4/5.5               | MS     | 167           | 12                         | 32                    |
| 5           | NP_249556.1 | PA0865    | Hpd          | 39.9/4.89              | MS     | 133           | 12                         | 29                    |
| 6           | NP_252329.1 | PA3639    | AccA         | 34.9/5.15              | MS     | 84            | 7                          | 26                    |
| 7           | NP_252345   | PA3655    | Tsf          | 30.7/4.95              | MS     | 135           | 9                          | 25                    |
| 8           | NP_252955   | PA4265    | TufA         | 43.3/5.03              | MS     | 133           | 9                          | 29                    |
| 9           | NP_253428.1 | PA4740    | Pnp          | 75.4/4.81              | MS     | 112           | 9                          | 17                    |

**Table S3: Bacterial strains and plasmids used in this study.**

Cb<sup>r</sup>, carbenicillin resistance ; Gm<sup>r</sup>, gentamycin resistance ; Tc<sup>r</sup>, tetracycline resistance.

| Strains/plasmids                     | Relevant characteristic(s)                                                    | Sources                      |
|--------------------------------------|-------------------------------------------------------------------------------|------------------------------|
| <b>Strains</b>                       |                                                                               |                              |
| <b><i>E. coli</i></b>                |                                                                               |                              |
| JM109                                | Cloning host                                                                  | Promega                      |
| S17.1                                | Conjugation strain                                                            | Simon et al., 1983           |
| <b><i>Pseudomonas aeruginosa</i></b> |                                                                               |                              |
| H103                                 | PAO1 derivative                                                               | Hancock, R. E. & Carey, 1979 |
| mPAO1                                | PAO1 derivative                                                               | Jacobs, M. A. et al., 2003   |
| $\Delta sigX$ (PAOSX)                | PAO1 H103 $\Delta sigX$                                                       | Bouffartigues et al., 2012   |
| $\Delta rpoH$                        | Transposon mutant <i>rpoH::IS;phoA/hah-Tc<sup>r</sup></i>                     | Jacobs, M. A. et al., 2003   |
| $\Delta algU$                        | PAO1 H103 $\Delta algU$                                                       | This study                   |
| <b>Plasmids</b>                      |                                                                               |                              |
| pAB133                               | Vector for transcriptional fusion analyzes. Gm <sup>r</sup>                   | Bazire et al., 2005          |
| pABcmaXL                             | pAB-PcmaX-luxCDABE. Gm <sup>r</sup>                                           | This study                   |
| pABcfrXL                             | pAB-PcfrX-luxCDABE. Gm <sup>r</sup>                                           | This study                   |
| pABcmpXL                             | pAB-PcmpX-luxCDABE. Gm <sup>r</sup>                                           | This study                   |
| pEXUGL                               | pEXalgU with <i>lox-aacC1-lox</i> cassette. Ap <sup>r</sup> , Gm <sup>r</sup> | Bazire et al., 2010          |
| pCM157                               | <i>cre</i> expression vector, Tc <sup>r</sup>                                 | Quenée et al., 2005          |

### References for Table S3

- Bouffartigues, E. *et al.* Transcription of the oprF gene of *Pseudomonas aeruginosa* is dependent mainly on the SigX sigma factor and is sucrose induced. *J. Bacteriol.* **194**, 4301–4311 (2012).
- Hancock, R. E. & Carey, A. M. Outer membrane of *Pseudomonas aeruginosa*: heat- 2-mercaptoethanol-modifiable proteins. *J. Bacteriol.* **140**, 902–910 (1979).
- Jacobs, M. A. *et al.* Comprehensive transposon mutant library of *Pseudomonas aeruginosa*. *Proc. Natl. Acad. Sci. U. S. A.* **100**, 14339–14344 (2003).
- Bazire, A. *et al.* Osmotic stress and phosphate limitation alter production of cell-to-cell signal molecules and rhamnolipid biosurfactant by *Pseudomonas aeruginosa*. *FEMS Microbiol. Lett.* **253**, 125–131 (2005).
- Quénéée, L., Lamotte, D. & Polack, B. Combined sacB-based negative selection and cre-lox antibiotic marker recycling for efficient gene deletion in *pseudomonas aeruginosa*. *BioTechniques* **38**, 63–67 (2005).
- Bazire, A. *et al.* The sigma factor AlgU plays a key role in formation of robust biofilms by nonmuroid *Pseudomonas aeruginosa*. *J. Bacteriol.* **192**, 3001–3010 (2010).
- Simon, R., Prierer, U. & Pühler, A. A Broad Host Range Mobilization System for In Vivo Genetic Engineering: Transposon Mutagenesis in Gram Negative Bacteria. *Nat. Biotechnol.* **1**, 784–791 (1983).

**Table S4:** Primer sequences of the indicated genes used for quantitative RT-qPCR reactions, transcription start sites identification and transcriptional fusions construction.

| PA number       | Gene name      | Primer name | Sequence (5' - 3')      |
|-----------------|----------------|-------------|-------------------------|
| <b>RT-qPCR</b>  |                |             |                         |
| PA1773          | <i>cmaX</i>    | PA1773      | AAAGGGCCGAAGACAGCAT     |
|                 |                | PA1773      | CGCGATCGGTCAGGTAGTG     |
| PA1774          | <i>cfrX</i>    | PA1774      | CTGCGGGACCTCGTCAAG      |
|                 |                | PA1774      | GCCGACCTGGCGATTG        |
| PA1775          | <i>cmpX</i>    | FPA1775     | GGCAGATCATTGCAGGAATCTAC |
|                 |                | RPA1775     | TCTCTCAATAGTGCCTTCAACGT |
| PA1609          | <i>fabB</i>    | F1609       | CCTCGGCAATGACAAAGACA    |
|                 |                | R1609       | GTAGGACGGATTGAAGCGAATG  |
| PA0762          | <i>algU</i>    | FalgU       | TACCTGGCTGTATCGGATCG    |
|                 |                | RalgU       | GAAGAACTCCGCATCCTCTG    |
| PA3540          | <i>algD</i>    | FPA3540     | GGGCTATGTGGTGCAGTATG    |
|                 |                | RPA3540     | GCGACTTGCCCTGGTTGAT     |
| PA              | <i>rpoH</i>    | FrpoH       | CGCAAACCTGGAAGCCTA      |
|                 |                | RrpoH       | GAACAACGAAGCGCAGGT      |
| PA1777          | <i>oprF</i>    | FPA1777     | GCGTACAGCTGGACATGAAG    |
|                 |                | RPA1777     | TTCATGAAGTCAGCCAGGTTCTT |
| PA3385          | <i>amrZ</i>    | FamrZ       | CGTGAGCAGATCGCAGAA      |
|                 |                | RamrZ       | GCTCGTGCAGGCTGAGTT      |
| PA1776          | <i>sigX</i>    | FPA1776     | AATTGATGCGGCGTTACCA     |
|                 |                | RPA1776     | CCAGGTAGCGGGCACAGA      |
| PA3639          | <i>accA</i>    | FaccA       | TCTTCGGCAATCTGACCAGTT   |
|                 |                | RaccA       | GTAGCCGATGTAGTCGAGGGTA  |
| PA4847          | <i>accB</i>    | FaccB       | AAGCCATGAAGATGATGAACC   |
|                 |                | RaccB       | CGTTCTCCACCAGGATCGA     |
| PA5174          | <i>fabY</i>    | FPA5174     | AGGGCGACCTGGAGATCAT     |
|                 |                | RPA5174     | GCGCGTCCTTCTTGTATACCA   |
| PA3006          | <i>psrA</i>    | FpsrA       | CGATTTCCGGCGTGAACAATT   |
|                 |                | RpsrA       | CGAAGAACGGCACCATCAG     |
| PA0668.1        | <i>16SrRNA</i> | F16SRNA     | AACCTGGGAACCTGCATCCAA   |
|                 |                | R16SRNA     | CTTCGCCACTGGTGTTCCTT    |
| <b>RACE-PCR</b> |                |             |                         |
| PA1775          | <i>cmpX</i>    | ASP1cmpX    | CCTTCAACGTCACCCACTTT    |
|                 |                | ASP2cmpX    | AACACCTTGGGCAGGTACAG    |

|        |             |                  |                      |
|--------|-------------|------------------|----------------------|
| PA1774 | <i>cfrX</i> | AS1 <i>cfrX</i>  | GCAGAAGATGCGTTTTTCG  |
|        |             | ASP2 <i>cfrX</i> | GCGGAAATACGGGAAACC   |
| PA1773 | <i>cmaX</i> | ASP1 <i>cmaX</i> | CAGGTAGTGCGCGAGGTAGT |
|        |             | ASP2 <i>cmaX</i> | CGGATTCAGGTTCACTCCAC |

### Transcriptional fusions

---

|          |                |                |                                    |
|----------|----------------|----------------|------------------------------------|
| **PA1773 | ** <i>cmaX</i> | FC <i>cmaX</i> | *taataagagctcGTTTCGTGTATGCCGACAACA |
|          |                | RC <i>cmaX</i> | *taataactagttGCGCTTCCCTTGGTAAAAC   |
| **PA1774 | ** <i>cfrX</i> | FCFR <i>X</i>  | *taataagagctcGAGTTGATACGGGAGCGCAT  |
|          |                | RCFR <i>X</i>  | *taataactagttCATGTCTGTACGAGGGAGTG  |
| **PA1775 | ** <i>cmpX</i> | FC <i>cmpX</i> | *taataagagctcCTGCGGGACCTGCTCAAG    |
|          |                | RC <i>cmpX</i> | *taataactagttCACTCAGCCTTGTCAGC     |

---

\* Nucleotides not in the chromosomal sequence are indicated in lower case.

\*\* Gene localized downstream the PCR-amplified DNA fragment

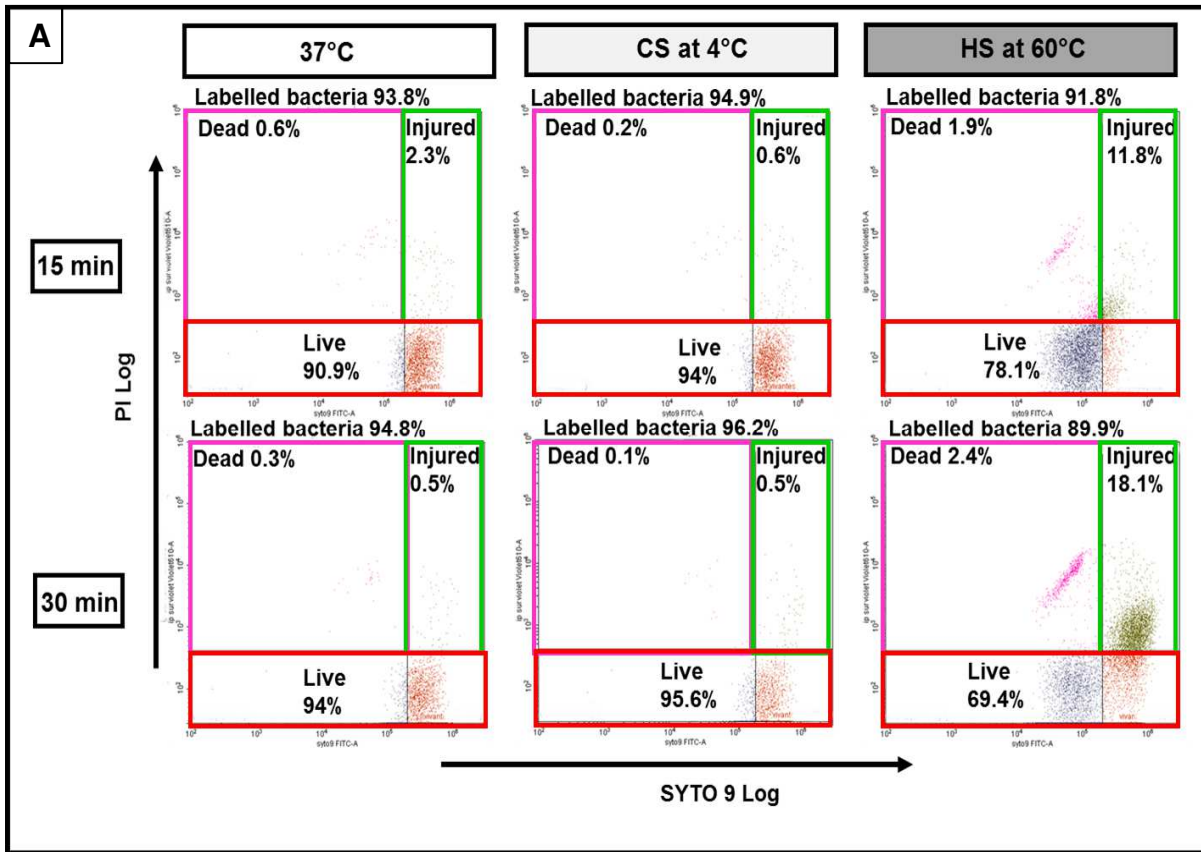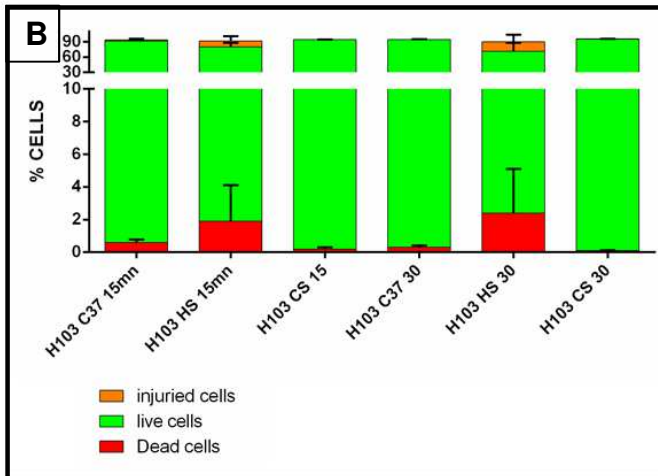

Fig. S1: Flow cytometry analysis of *P. aeruginosa* H103 viability exposed or not to CS or HS.



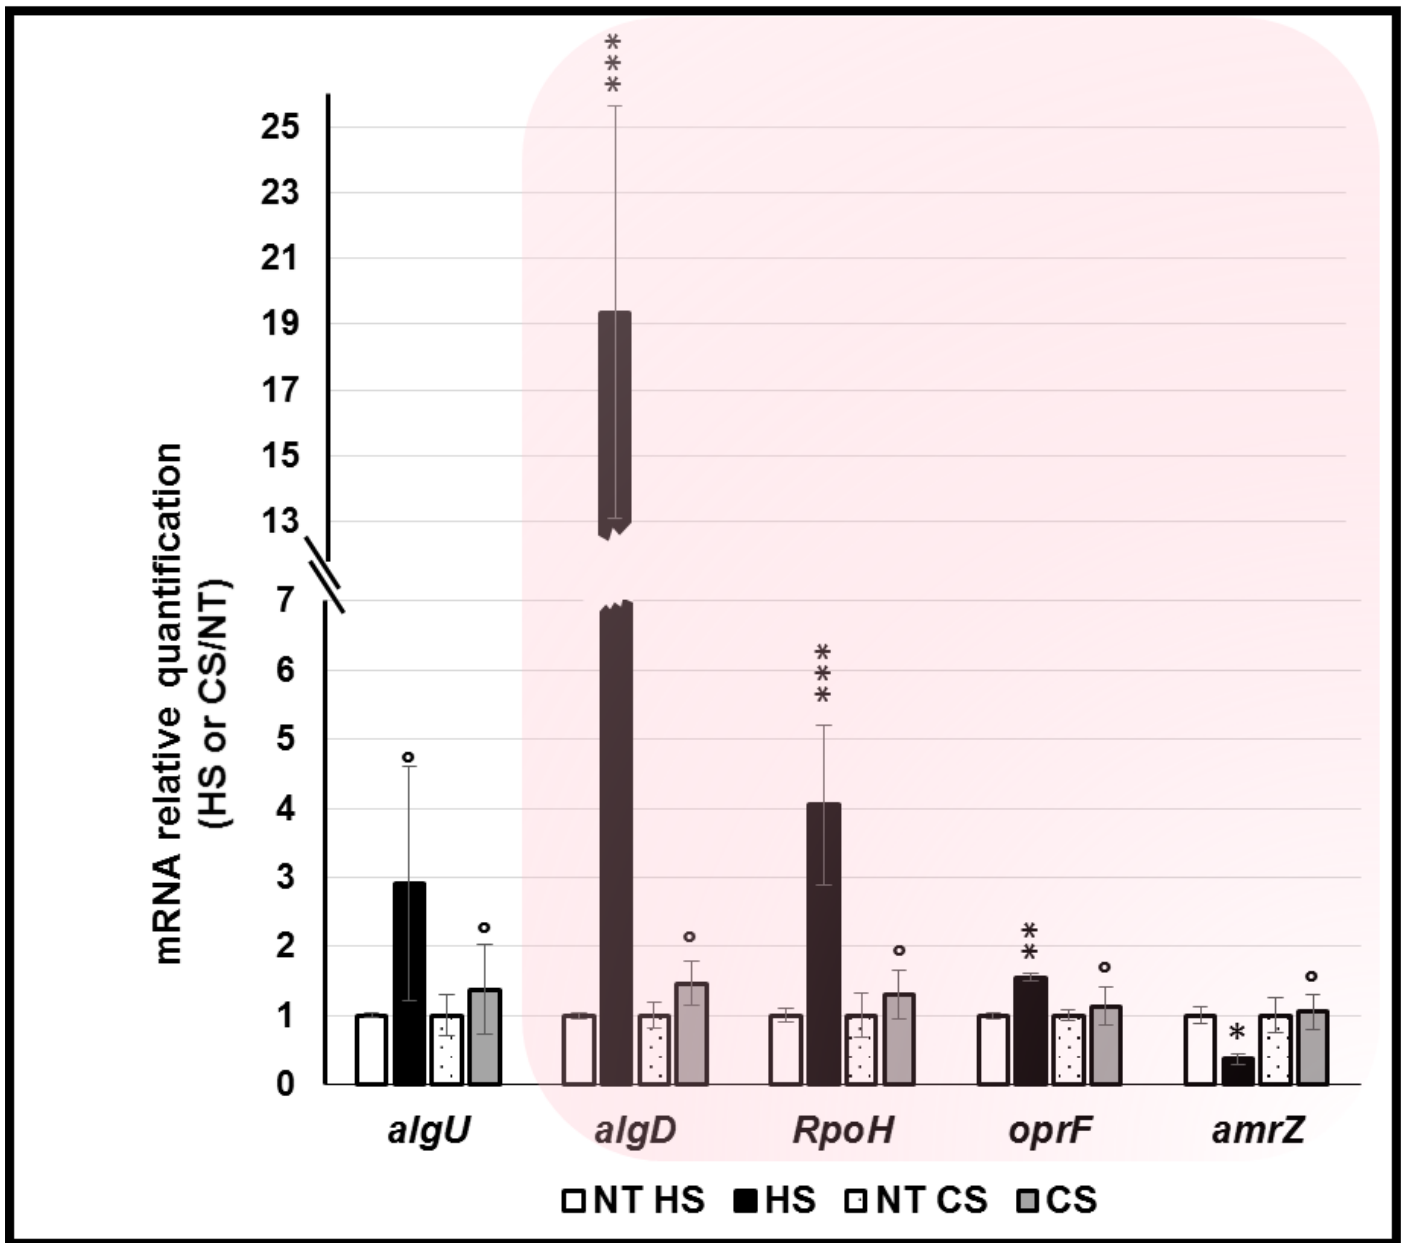

Fig. S2: Effect of HS and CS on *algU* expression and activity.

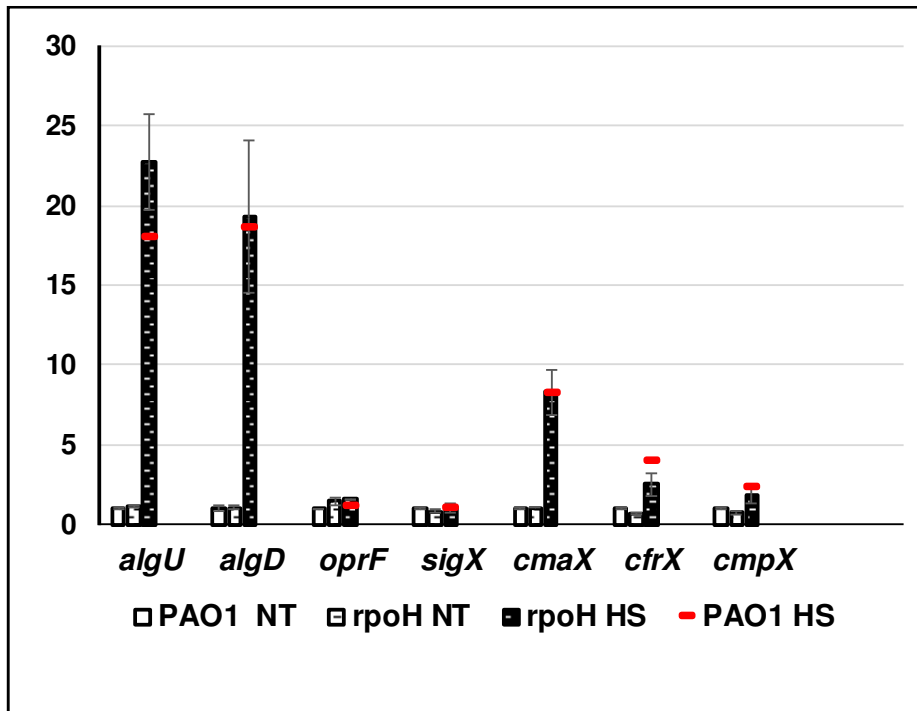

Fig. S3: RpoH is not involved in the *cmaX*, *cfrX* and *cmpX* regulation in response to HS in PAO1.

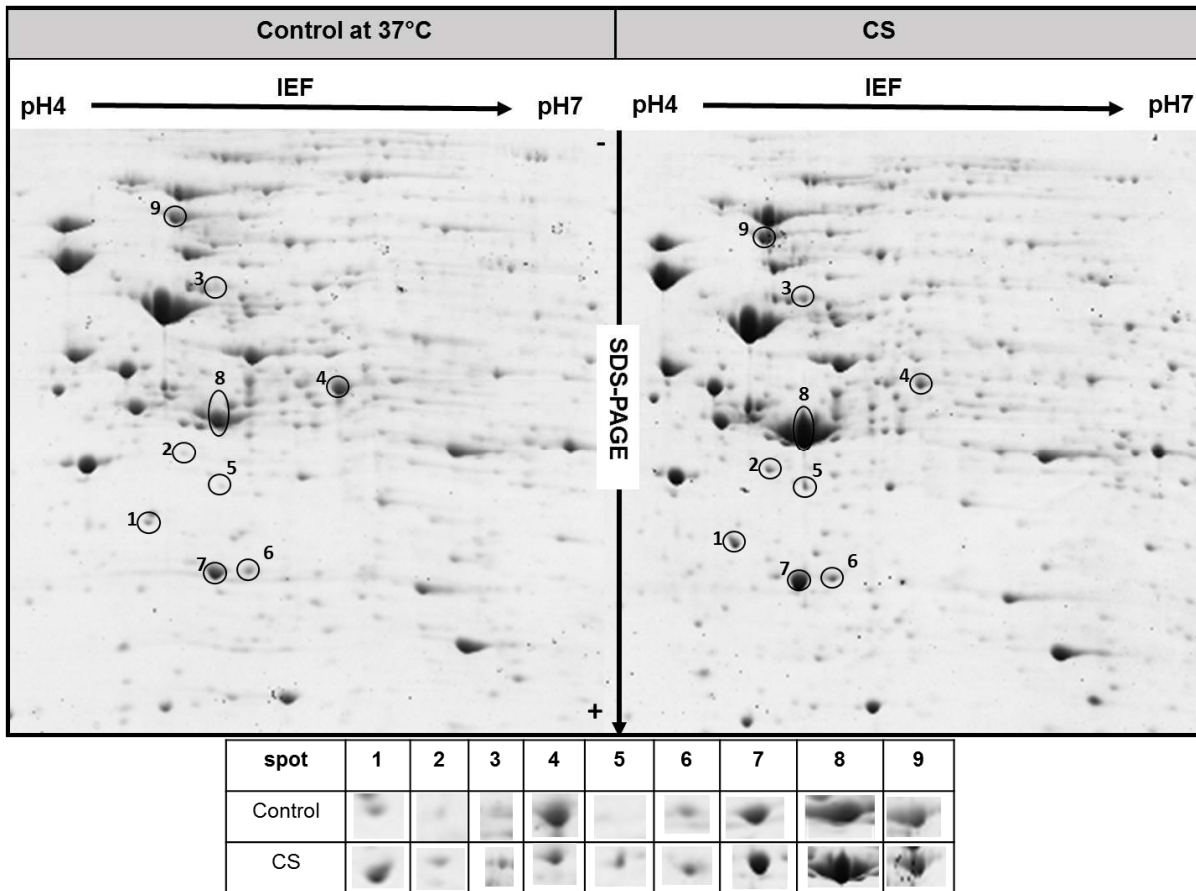

Fig. S4: 2-DE total protein profiles of *P. aeruginosa* exposed to CS from 37°C to 4°C or not (control).

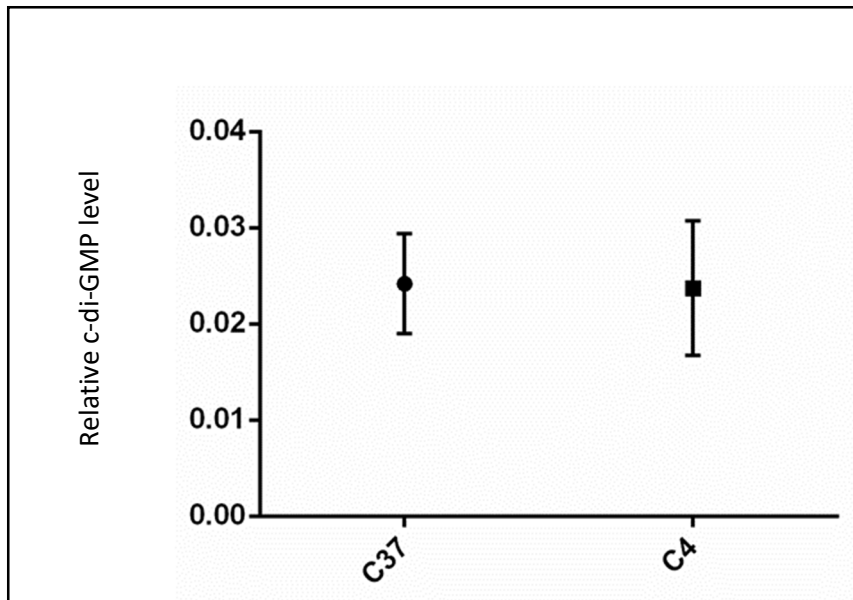

Fig. S5: c-di-GMP level quantification by LC-MS/MS in H103 strain exposed (square) or not to a CS (point).

#### References for Supplementary Fig. S5

Strehmel, J. *et al.* Sensor kinase PA4398 modulates swarming motility and biofilm formation in *Pseudomonas aeruginosa* PA14. *Appl Environ Microbiol.* 81(4):1274-85. (2015).

Bouffartigues, E. *et al.* The absence of the *Pseudomonas aeruginosa* OprF protein leads to increased biofilm formation through variation in c-di-GMP level. *Front Microbiol.*; 6: 630. (2015).

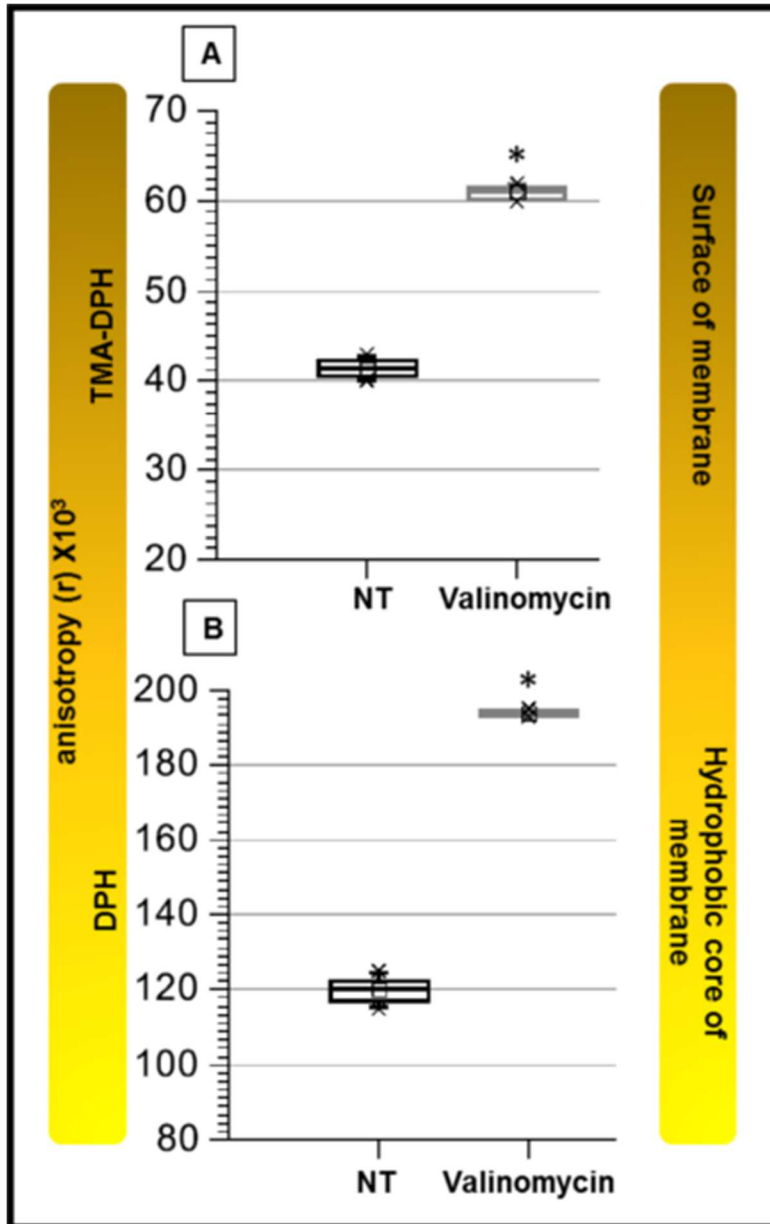

Fig. S6: Effect of a sublethal dose of valinomycin on membrane fluidity measured by fluorescence polarization in stationary growth phase.
